# Supplementary material
Source: HighWire-hosted journal article supplement (https://adc.bmj.com/content/106/1/58)
Supplement: inline-supplementary-material-1 [file inline-supplementary-material-1.pdf]

## Appendix 1

Table 1. MOS score agreement for Nights 1, 2 and 3. Patients were excluded if they did not have an adequate duration of 6 hours on both nights compared.

| Score on Night 1 | Score on Night 2 | Agreement   | Score on Night 1 | Score on Night 3 | Agreement  | Score on Night 2 | Score on Night 3 | Agreement  |
|------------------|------------------|-------------|------------------|------------------|------------|------------------|------------------|------------|
| 1                | 1                | 100 (42.4%) | 1                | 1                | 99 (43.6%) | 1                | 1                | 89 (39.9%) |
| 1                | 2                | 26 (11%)    | 1                | 2                | 17 (7.5%)  | 1                | 2                | 16 (7.2%)  |
| 1                | 3                | 2 (0.9%)    | 1                | 3                | 9 (4%)     | 1                | 3                | 7 (3.1%)   |
| 1                | 4                | 1(0.4%)     | 1                | 4                | 2 (0.9%)   | 1                | 4                | 2 (0.9%)   |
| 2                | 1                | 16 (6.8%)   | 2                | 1                | 13 (5.7%)  | 2                | 1                | 16 (7.2%)  |
| 2                | 2                | 23 (9.75%)  | 2                | 2                | 16 (7.1%)  | 2                | 2                | 20 (9%)    |
| 2                | 3                | 5 (2.1%)    | 2                | 3                | 10 (4.4%)  | 2                | 3                | 19 (8.5%)  |
| 2                | 4                | 5 (2.1%)    | 2                | 4                | 8 (3.5%)   | 2                | 4                | 5 (2.2%)   |
| 3                | 1                | 2 (0.9%)    | 3                | 1                | 2 (0.9%)   | 3                | 1                | 2 (0.9%)   |
| 3                | 2                | 9 (3.8%)    | 3                | 2                | 4 (1.8%)   | 3                | 2                | 5 (2.2%)   |
| 3                | 3                | 8 (3.4%)    | 3                | 3                | 9 (4%)     | 3                | 3                | 5 (2.2%)   |
| 3                | 4                | 10 (4.2%)   | 3                | 4                | 6 (2.6%)   | 3                | 4                | 7 (3.1%)   |
| 4                | 1                | 2 (0.9%)    | 4                | 1                | 2 (0.9%)   | 4                | 1                | 1 (0.5%)   |
| 4                | 2                | 6 (2.5%)    | 4                | 2                | 3 (1.3%)   | 4                | 2                | 2 (0.9%)   |
| 4                | 3                | 6 (2.5%)    | 4                | 3                | 8 (3.5%)   | 4                | 3                | 8 (3.6%)   |
| 4                | 4                | 15 (6.4%)   | 4                | 4                | 19 (8.4%)  | 4                | 4                | 19 (8.5%)  |

**Table 2. MOS score agreement for Nights 1, 2 and 3 for Group 1. Patients were excluded if they did not have an adequate duration of 6 hours on both nights compared**

| Score on Night 1 | Score on Night 2 | Agreement  | Score on Night 1 | Score on Night 3 | Agreement | Score on Night 2 | Score on Night 3 | Agreement  |
|------------------|------------------|------------|------------------|------------------|-----------|------------------|------------------|------------|
| 1                | 1                | 73 (48%)   | 1                | 1                | 73 (50%)  | 1                | 1                | 64 (45.1%) |
| 1                | 2                | 16 (10.5%) | 1                | 2                | 10 (6.9%) | 1                | 2                | 12 (8.5%)  |
| 1                | 3                | 2 (1.3%)   | 1                | 3                | 4 (2.7%)  | 1                | 3                | 3 (2.1%)   |
| 1                | 4                | 1 (0.7%)   | 1                | 4                | 1 (0.7%)  | 1                | 4                | 2 (1.4%)   |
| 2                | 1                | 10 (6.6%)  | 2                | 1                | 8 (5.5%)  | 2                | 1                | 12 (8.5%)  |
| 2                | 2                | 13 (8.6%)  | 2                | 2                | 11 (7.5%) | 2                | 2                | 9 (6.3%)   |
| 2                | 3                | 3 (2%)     | 2                | 3                | 5 (3.4%)  | 2                | 3                | 9 (6.3%)   |
| 2                | 4                | 3 (2%)     | 2                | 4                | 3 (2.1%)  | 2                | 4                | 3 (2.1%)   |
| 3                | 1                | 1 (0.7%)   | 3                | 1                | 1 (0.7%)  | 3                | 1                | 2 (1.4%)   |
| 3                | 2                | 3 (2%)     | 3                | 2                | 2 (1.4%)  | 3                | 2                | 4 (2.8%)   |
| 3                | 3                | 5 (3.3%)   | 3                | 3                | 7 (4.8%)  | 3                | 3                | 2 (1.4%)   |
| 3                | 4                | 6 (4%)     | 3                | 4                | 3 (2.1%)  | 3                | 4                | 3 (2.1%)   |
| 4                | 1                | 2 (1.3%)   | 4                | 1                | 1 (0.7%)  | 4                | 1                | 1 (0.7%)   |
| 4                | 2                | 4 (2.6%)   | 4                | 2                | 2 (1.4%)  | 4                | 2                | 1 (0.7%)   |
| 4                | 3                | 2 (1.3%)   | 4                | 3                | 5 (3.4%)  | 4                | 3                | 7 (4.9%)   |
| 4                | 4                | 8 (5.3%)   | 4                | 4                | 10 (6.9%) | 4                | 4                | 8 (5.6%)   |

**Table 3. MOS score agreement for Nights 1, 2 and 3 for Group 2. Patients were excluded if they did not have an adequate duration of 6 hours on both nights compared**

| Score on Night 1 | Score on Night 2 | Agreement  | Score on Night 1 | Score on Night 3 | Agreement | Score on Night 2 | Score on Night 3 | Agreement  |
|------------------|------------------|------------|------------------|------------------|-----------|------------------|------------------|------------|
| 1                | 1                | 9 (33.3 %) | 1                | 1                | 8 (33.3%) | 1                | 1                | 10 (38.5%) |
| 1                | 2                | 2 (7.4%)   | 1                | 2                | 1 (4.2%)  | 1                | 2                | 0          |
| 1                | 3                | 0          | 1                | 3                | 2 (8.3%)  | 1                | 3                | 2 (7.7%)   |
| 1                | 4                | 0          | 1                | 4                | 0         | 1                | 4                | 0          |
| 2                | 1                | 2 (7.4%)   | 2                | 1                | 1 (4.2%)  | 2                | 1                | 0          |
| 2                | 2                | 4 (14.8%)  | 2                | 2                | 1 (4.2%)  | 2                | 2                | 2 (7.7%)   |
| 2                | 3                | 1 (3.7%)   | 2                | 3                | 2 (8.3%)  | 2                | 3                | 4 (15.4%)  |
| 2                | 4                | 0          | 2                | 4                | 2 (8.3%)  | 2                | 4                | 1 (3.9%)   |
| 3                | 1                | 1 (3.7%)   | 3                | 1                | 1 (4.2%)  | 3                | 1                | 0          |
| 3                | 2                | 2 (7.4%)   | 3                | 2                | 1 (4.2%)  | 3                | 2                | 1 (3.9%)   |
| 3                | 3                | 1 (3.7%)   | 3                | 3                | 1 (4.2%)  | 3                | 3                | 1 (3.9%)   |
| 3                | 4                | 0          | 3                | 4                | 0         | 3                | 4                | 2 (7.7%)   |
| 4                | 1                | 0          | 4                | 1                | 0         | 4                | 1                | 0          |
| 4                | 2                | 1 (3.7%)   | 4                | 2                | 0         | 4                | 2                | 0          |
| 4                | 3                | 2 (7.4%)   | 4                | 3                | 1 (4.2%)  | 4                | 3                | 0          |
| 4                | 4                | 2 (7.4%)   | 4                | 4                | 3 (12.5%) | 4                | 4                | 3 (11.5%)  |

**Table 4. MOS score agreement for Nights 1, 2 and 3 for Group 3. Patients were excluded if they did not have an adequate duration of 6 hours on both nights compared**

| Score on Night 1 | Score on Night 2 | Agreement  | Score on Night 1 | Score on Night 3 | Agreement  | Score on Night 2 | Score on Night 3 | Agreement  |
|------------------|------------------|------------|------------------|------------------|------------|------------------|------------------|------------|
| 1                | 1                | 16 (30.2%) | 1                | 1                | 16 (30.2%) | 1                | 1                | 13 (25.5%) |
| 1                | 2                | 8 (15.1%)  | 1                | 2                | 6 (11.3%)  | 1                | 2                | 4 (7.8%)   |
| 1                | 3                | 0          | 1                | 3                | 3 (5.7%)   | 1                | 3                | 2 (3.9%)   |
| 1                | 4                | 0          | 1                | 4                | 1 (1.9%)   | 1                | 4                | 0          |
| 2                | 1                | 4 (7.6%)   | 2                | 1                | 4 (7.6%)   | 2                | 1                | 4 (7.8%)   |
| 2                | 2                | 4 (7.6%)   | 2                | 2                | 3 (5.7%)   | 2                | 2                | 8 (15.7%)  |
| 2                | 3                | 1 (1.9%)   | 2                | 3                | 2 (3.8%)   | 2                | 3                | 5 (9.8%)   |
| 2                | 4                | 2 (3.8%)   | 2                | 4                | 3 (5.7%)   | 2                | 4                | 1 (2%)     |
| 3                | 1                | 0          | 3                | 1                | 0          | 3                | 1                | 0          |
| 3                | 2                | 4 (7.6%)   | 3                | 2                | 1 (1.9%)   | 3                | 2                | 0          |
| 3                | 3                | 2 (3.8%)   | 3                | 3                | 1 (1.9%)   | 3                | 3                | 2 (3.9%)   |
| 3                | 4                | 4 (7.6%)   | 3                | 4                | 3 (5.7%)   | 3                | 4                | 2 (3.9%)   |
| 4                | 1                | 0          | 4                | 1                | 1 (1.9%)   | 4                | 1                | 0          |
| 4                | 2                | 1 (1.9%)   | 4                | 2                | 1 (1.9%)   | 4                | 2                | 1 (2%)     |
| 4                | 3                | 2 (3.8%)   | 4                | 3                | 2 (3.8%)   | 4                | 3                | 1 (2%)     |
| 4                | 4                | 5 (9.4%)   | 4                | 4                | 6 (11.3%)  | 4                | 4                | 8 (15.7%)  |
