# Supplementary material
Source: HighWire-hosted journal article supplement (https://adc.bmj.com/content/106/1/58)
Supplement: inline-supplementary-material-2 [file inline-supplementary-material-2.pdf]

**Appendix 2.****Table 1. Diagnoses and highest MOS score for patients in Group 3**

| <b>Underlying Diagnosis</b> | <b>Number of Children</b> | <b>MOS 1</b> | <b>MOS 2</b> | <b>MOS 3</b> | <b>MOS 4</b> |
|-----------------------------|---------------------------|--------------|--------------|--------------|--------------|
| Achondroplasia              | 10                        | 3            | 4            | 1            | 2            |
| Arthrogyphosis              | 1                         |              |              | 1            |              |
| Cerebral Palsy              | 2                         |              | 2            |              |              |
| CHARGE Syndrome             | 1                         |              |              | 1            |              |
| Cleft Palate                | 1                         |              |              |              | 1            |
| Complex Neurodisability     | 5                         | 1            | 2            |              | 2            |
| Cri Du Chat Syndrome        | 1                         |              | 1            |              |              |
| Crouzon Syndrome            | 3                         | 1            |              | 1            | 1            |
| Macroglossia                | 1                         |              |              | 1            |              |
| Mitochondrial Disorder      | 4                         | 2            | 2            |              |              |
| Obesity                     | 5                         |              | 3            | 2            |              |
| Partial Trisomy 9           | 1                         |              | 1            |              |              |
| Pfeiffer Syndrome           | 1                         |              |              | 1            |              |
| Pierre-Robin Sequence       | 12                        | 4            | 1            | 1            | 5            |
| Prader-Willi Syndrome       | 18                        | 7            | 3            | 3            | 4            |
| Progeria                    | 1                         |              |              | 1            |              |
| Rubenstein-Taybi Syndrome   | 4                         | 1            |              |              | 2            |
| Spina Bifida                | 5                         | 1            | 1            | 1            | 2            |
| Subglottic Stenosis         | 1                         |              | 1            |              |              |
| Turners Syndrome            | 4                         | 2            |              | 1            | 1            |
| 22q Deletion                | 1                         | 1            |              |              |              |

1 patient with Pierre Robin Sequence didn't have a study > 6 hours

1 patient with Prader-Willi Syndrome didn't have a study > 6 hours

1 patient with Rubenstein-Taybi Syndrome didn't have a study > 6 hours
