# Supplementary material
Source: HighWire-hosted journal article supplement (https://adc.bmj.com/content/106/1/58)
Supplement: inline-supplementary-material-3 [file inline-supplementary-material-3.pdf]

**Appendix 3****Table 1. Diagnoses and potential MOS scores for patients with an overnight oximetry study with 4 - 6 hours continuous AF recording**

| <b>Underlying diagnosis</b>     | <b>Number of patients with 4-6 hours AF recording</b> | <b>Number of patients with a MOS &gt;1</b> | <b>MOS 2</b> | <b>MOS 3</b> | <b>MOS 4</b> |
|---------------------------------|-------------------------------------------------------|--------------------------------------------|--------------|--------------|--------------|
| Achondroplasia                  | 1                                                     | 1                                          |              | 1            |              |
| Arthrogryphosis                 | 1                                                     | 0                                          |              |              |              |
| Crouzon Syndrome                | 1                                                     | 0                                          |              |              |              |
| Down Syndrome                   | 5                                                     | 3                                          | 1            | 1            | 1            |
| No underlying medical condition | 30                                                    | 10                                         | 7            | 2            | 1            |
| Pierre-Robin Sequence           | 2                                                     | 2                                          | 1            |              | 1            |
| Prader-Willi Syndrome           | 5                                                     | 3                                          | 3            |              |              |
| Progeria                        | 1                                                     | 0                                          |              |              |              |
| Rubenstein-Taybi Syndrome       | 2                                                     | 1                                          |              |              | 1            |
